# Supplementary material for: Physical state of cellulose in BmimCl: dependence of molar mass on viscoelasticity and sol-gel transition
Source: Royal Society of Chemistry journal article supplement (doi:10.1039/c5cp06616f), 2015-11-27
Supplement: c5cp06616f1.pdf [file c5cp06616f1.pdf]

Supporting Information

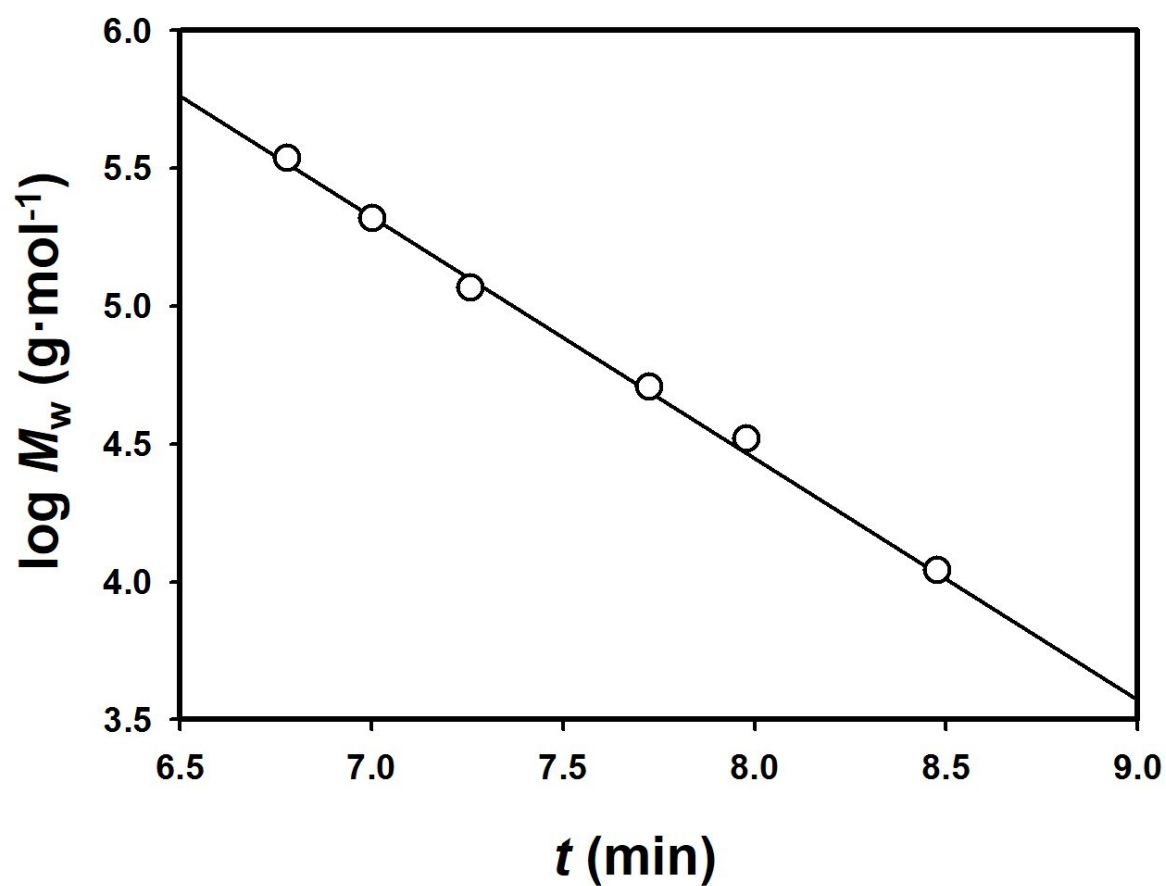

Figure S1. Dependence of molar mass on retention time for standard polysaccharide/DMAC/LiCl solutions

**Table S1.** Composition analysis of cellulose hydrolyzed by BmimCl<sup>a</sup>

| Dissolution time (h) | Cellulose (%) | Hemicellulose (%) | Lignin (%) <sup>b</sup> |
|----------------------|---------------|-------------------|-------------------------|
| 0                    | 95 ± 3        | 2 ± 2             | -                       |
| 24                   | 96 ± 2        | 2 ± 1             | -                       |
| 48                   | 96 ± 3        | 1 ± 1             | -                       |
| 72                   | 96 ± 2        | 2 ± 1             | -                       |
| 96                   | 97 ± 3        | 1 ± 3             | -                       |
| 120                  | 96 ± 3        | 2 ± 2             | -                       |
| 144                  | 95 ± 1        | 1 ± 1             | -                       |
| 168                  | 96 ± 1        | 1 ± 2             | -                       |
| 192                  | 97 ± 2        | 1 ± 2             | -                       |
| 216                  | 97 ± 1        | -                 | -                       |
| 240                  | 97 ± 2        | -                 | -                       |

<sup>a</sup>All measurements are an average of triplicate samples.

<sup>b</sup>Lignin was not detected in all samples.
